# Supplementary material for: Personalized circulating tumor DNA detection to monitor immunotherapy efficacy and predict outcome in locally advanced or metastatic non‐small cell lung cancer
Source: PubMed Central journal article supplement (PMC10358227; doi:10.1002/cam4.6108), 2023-05-15

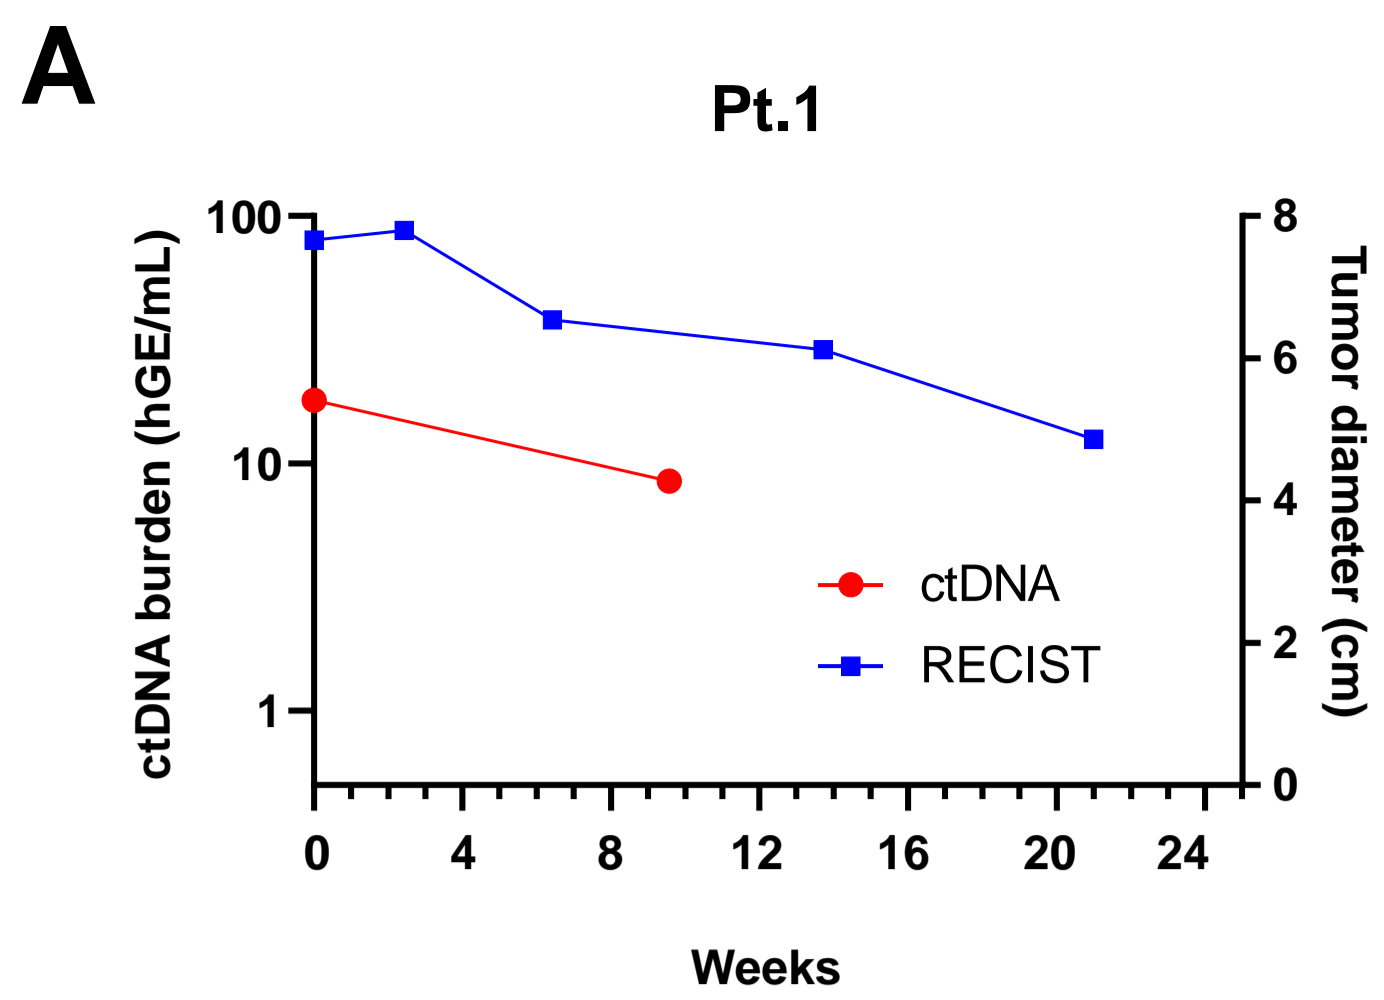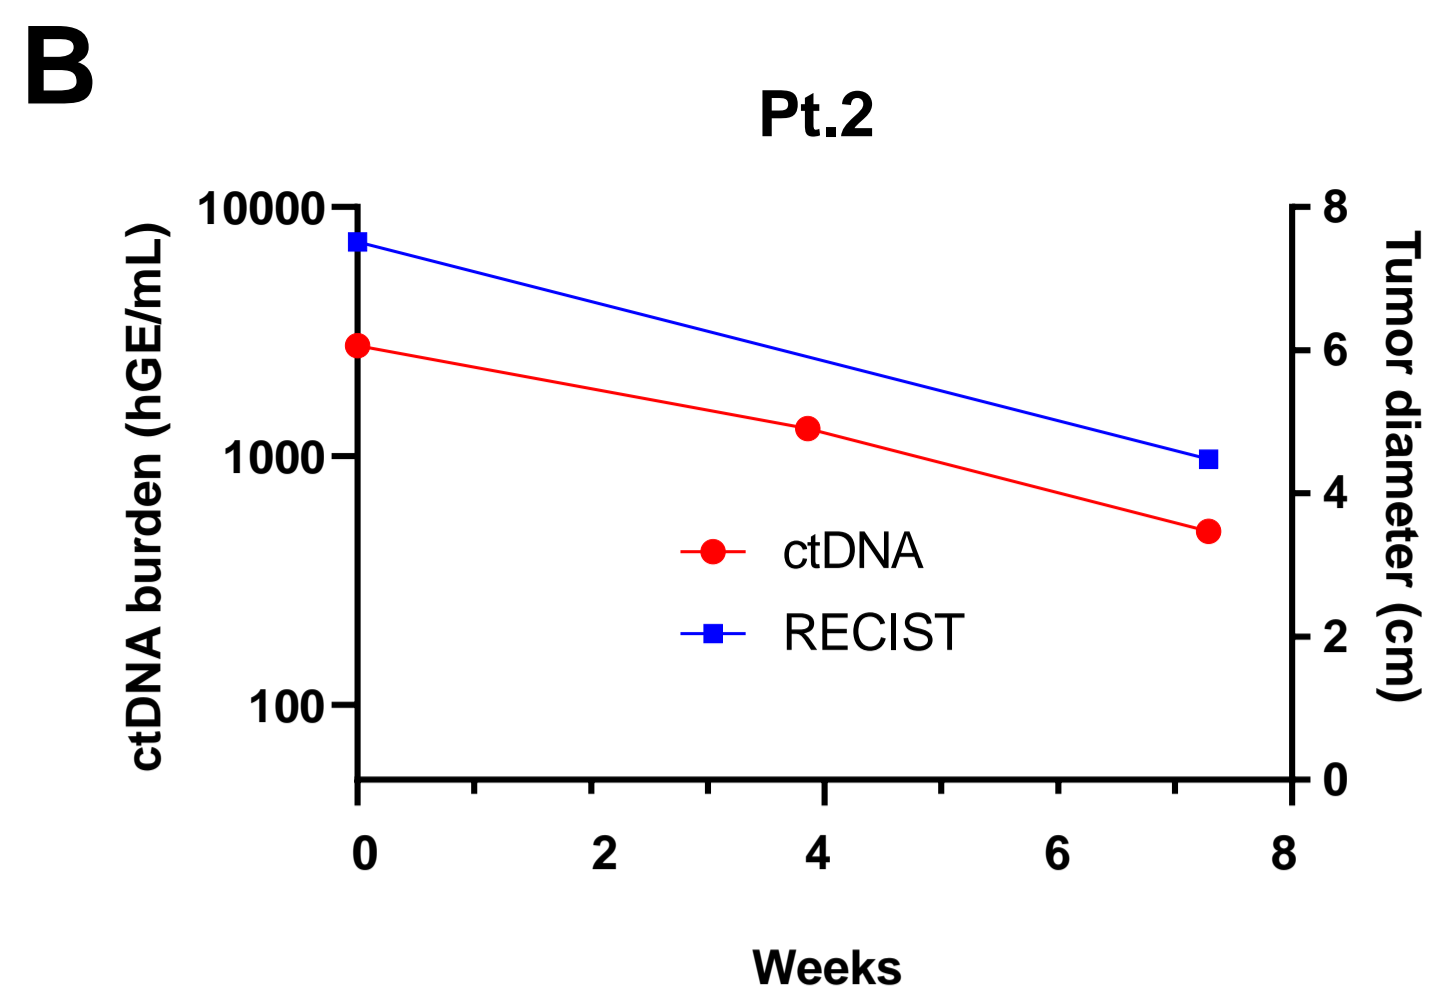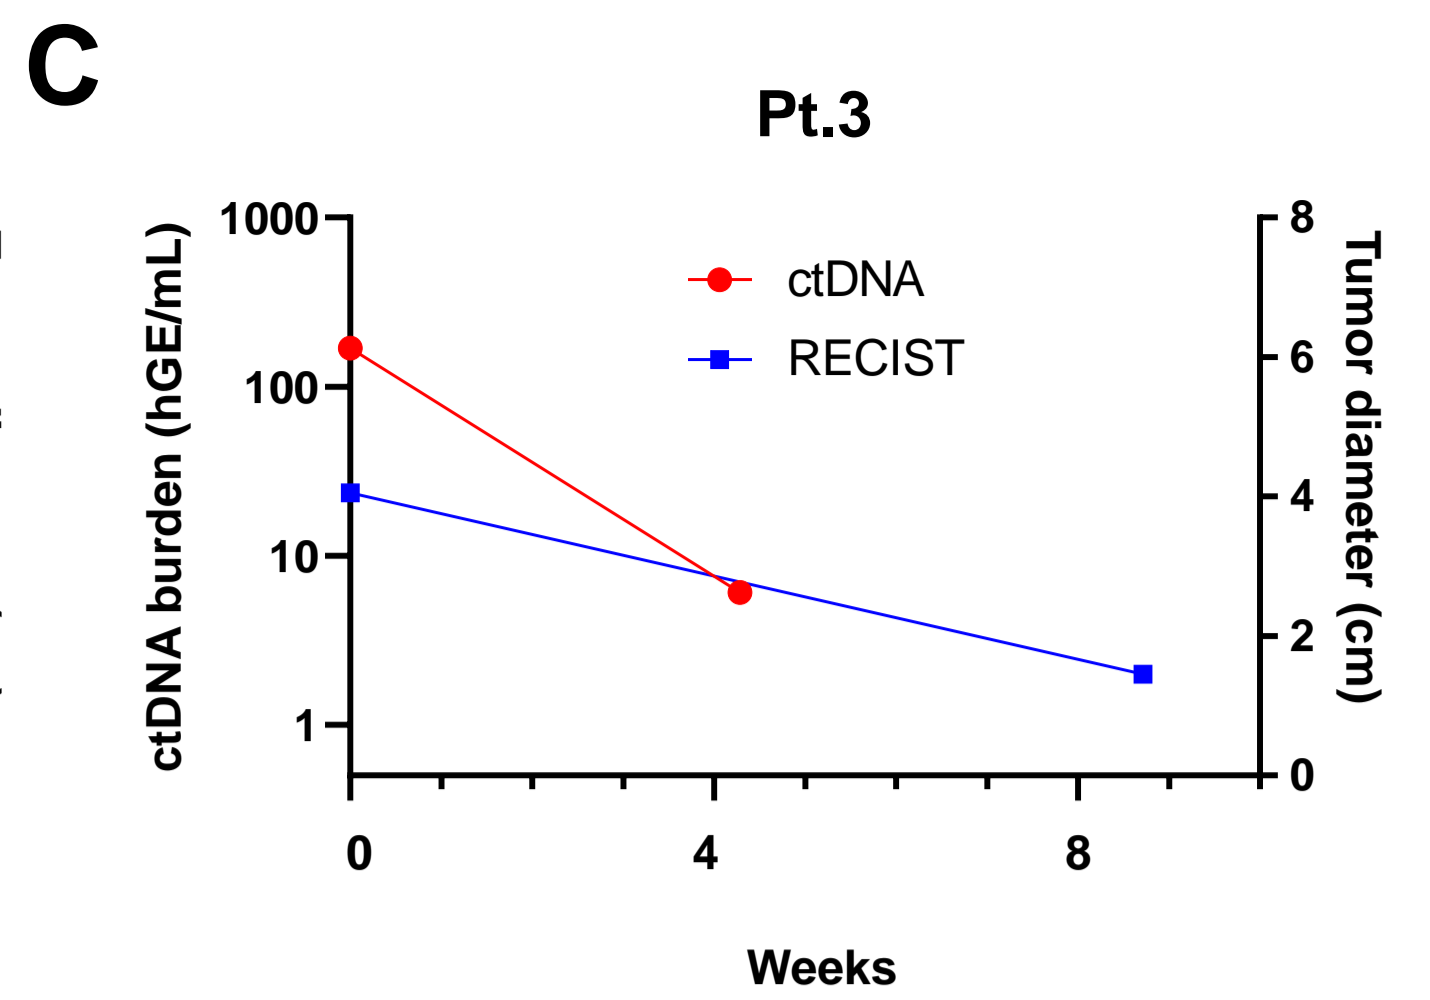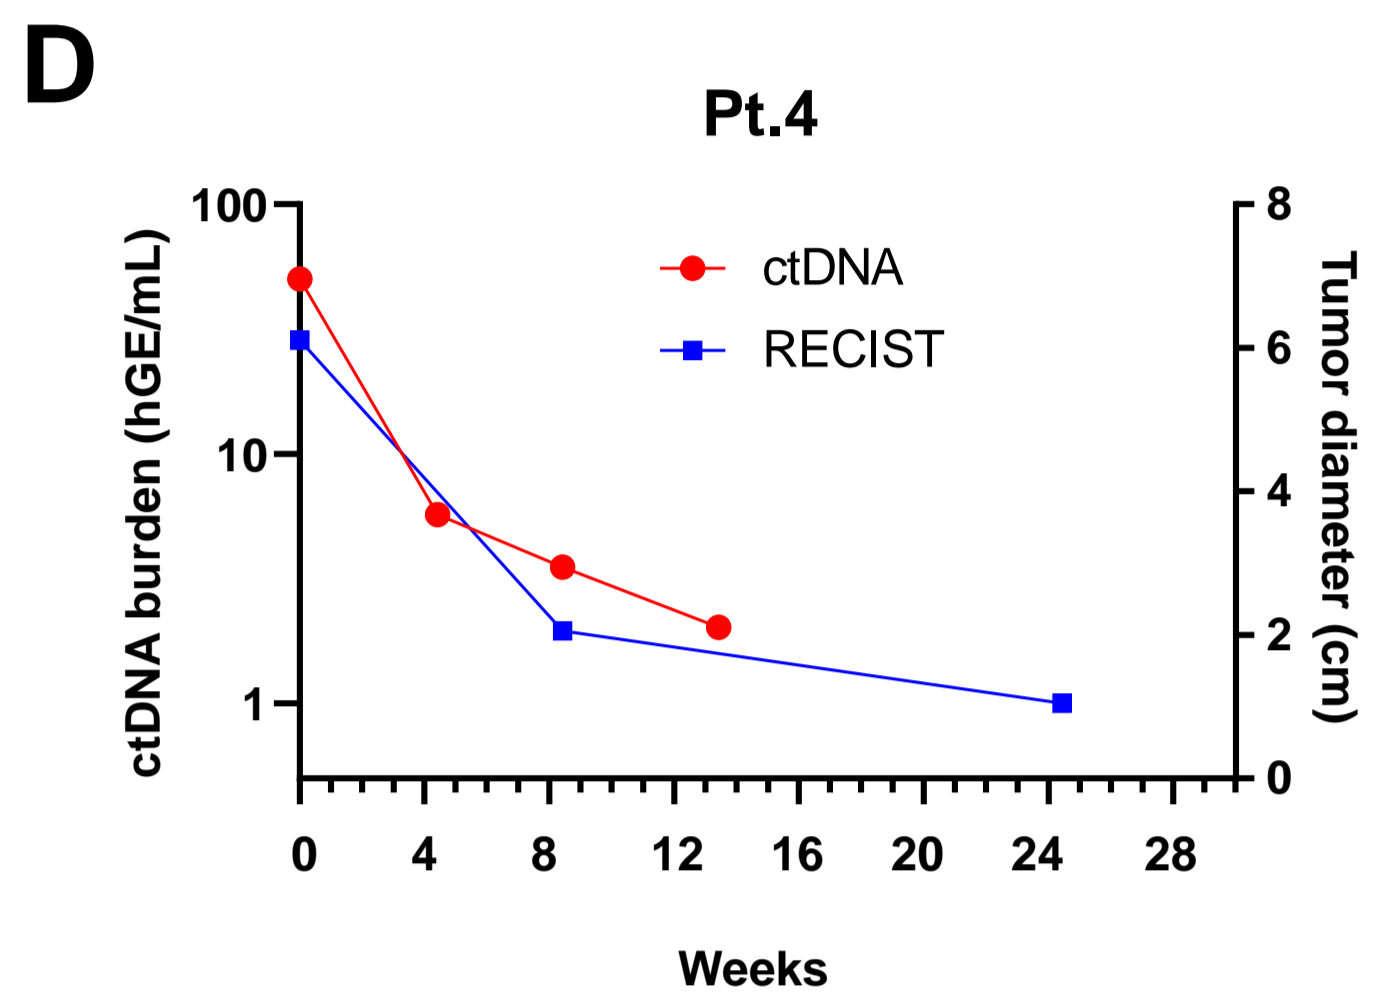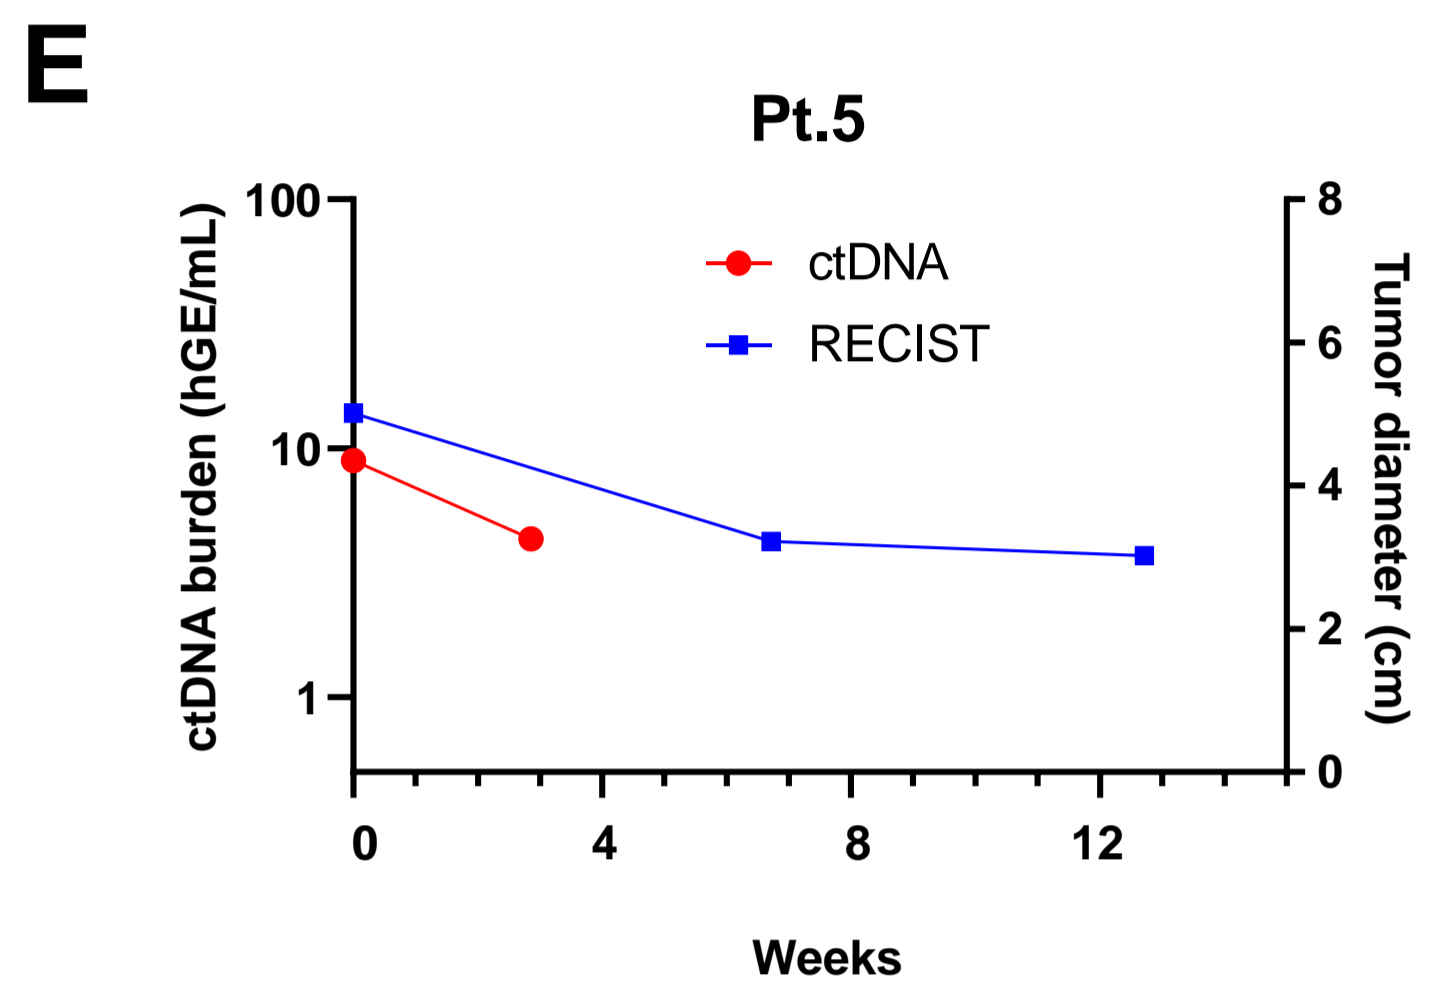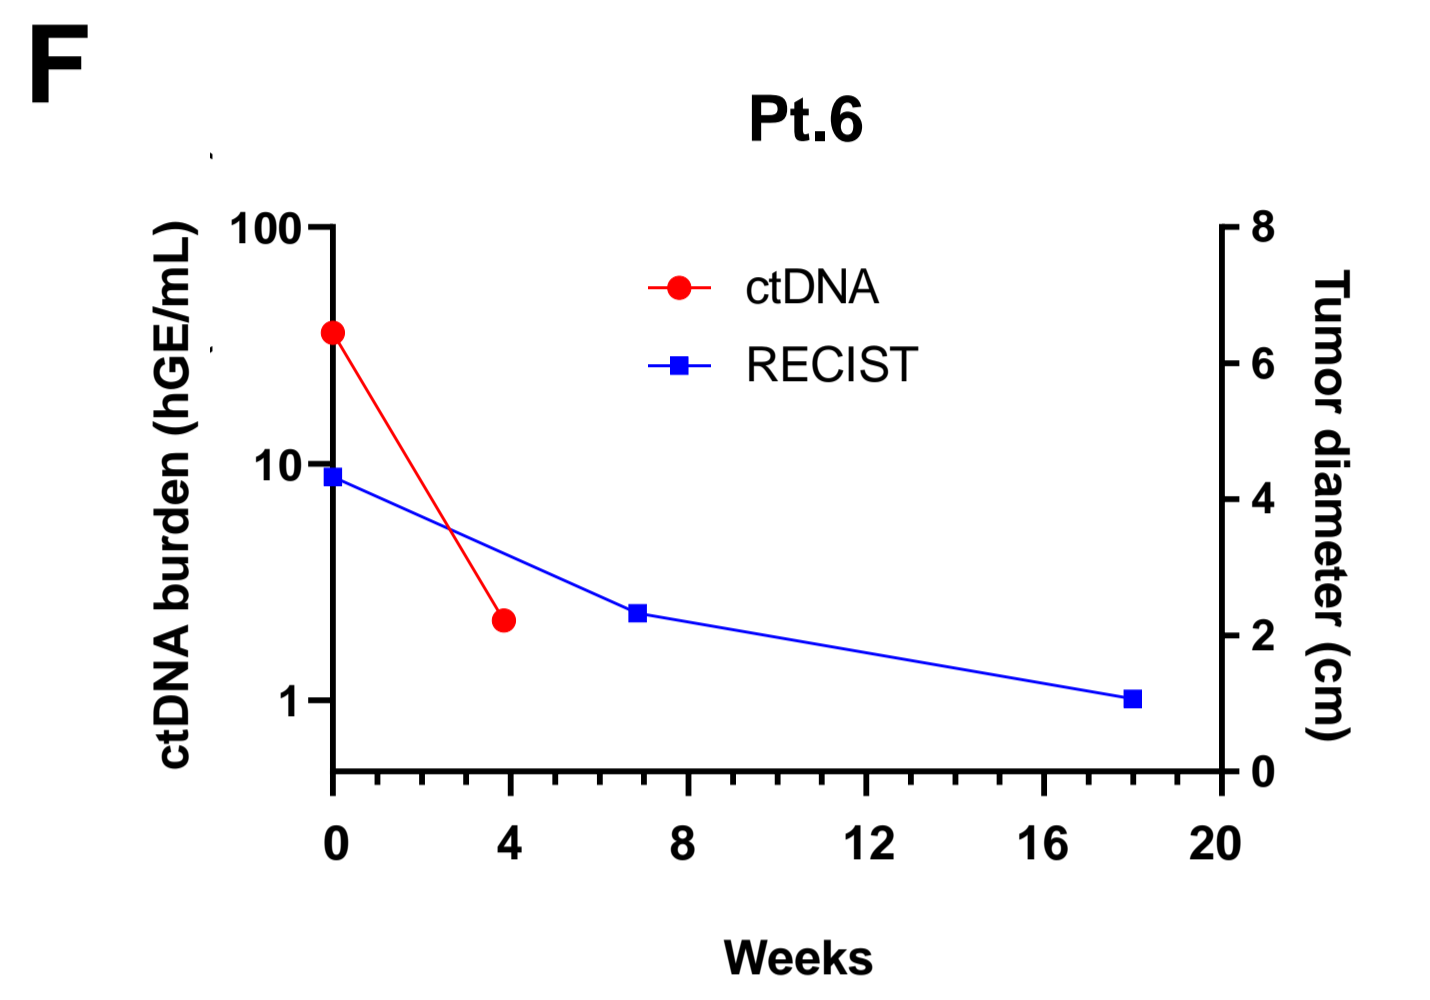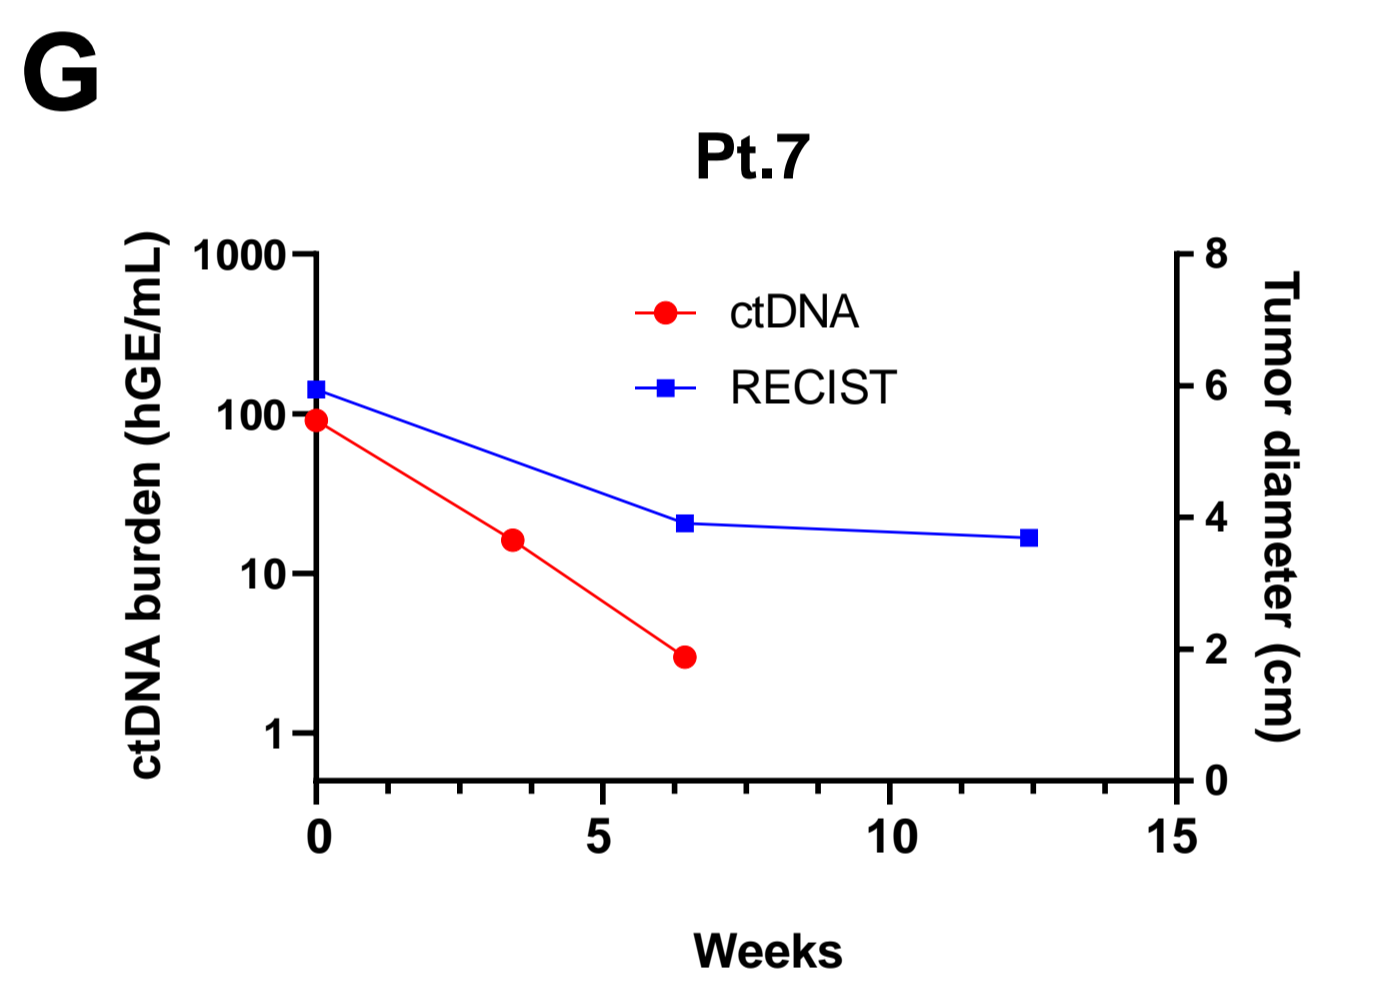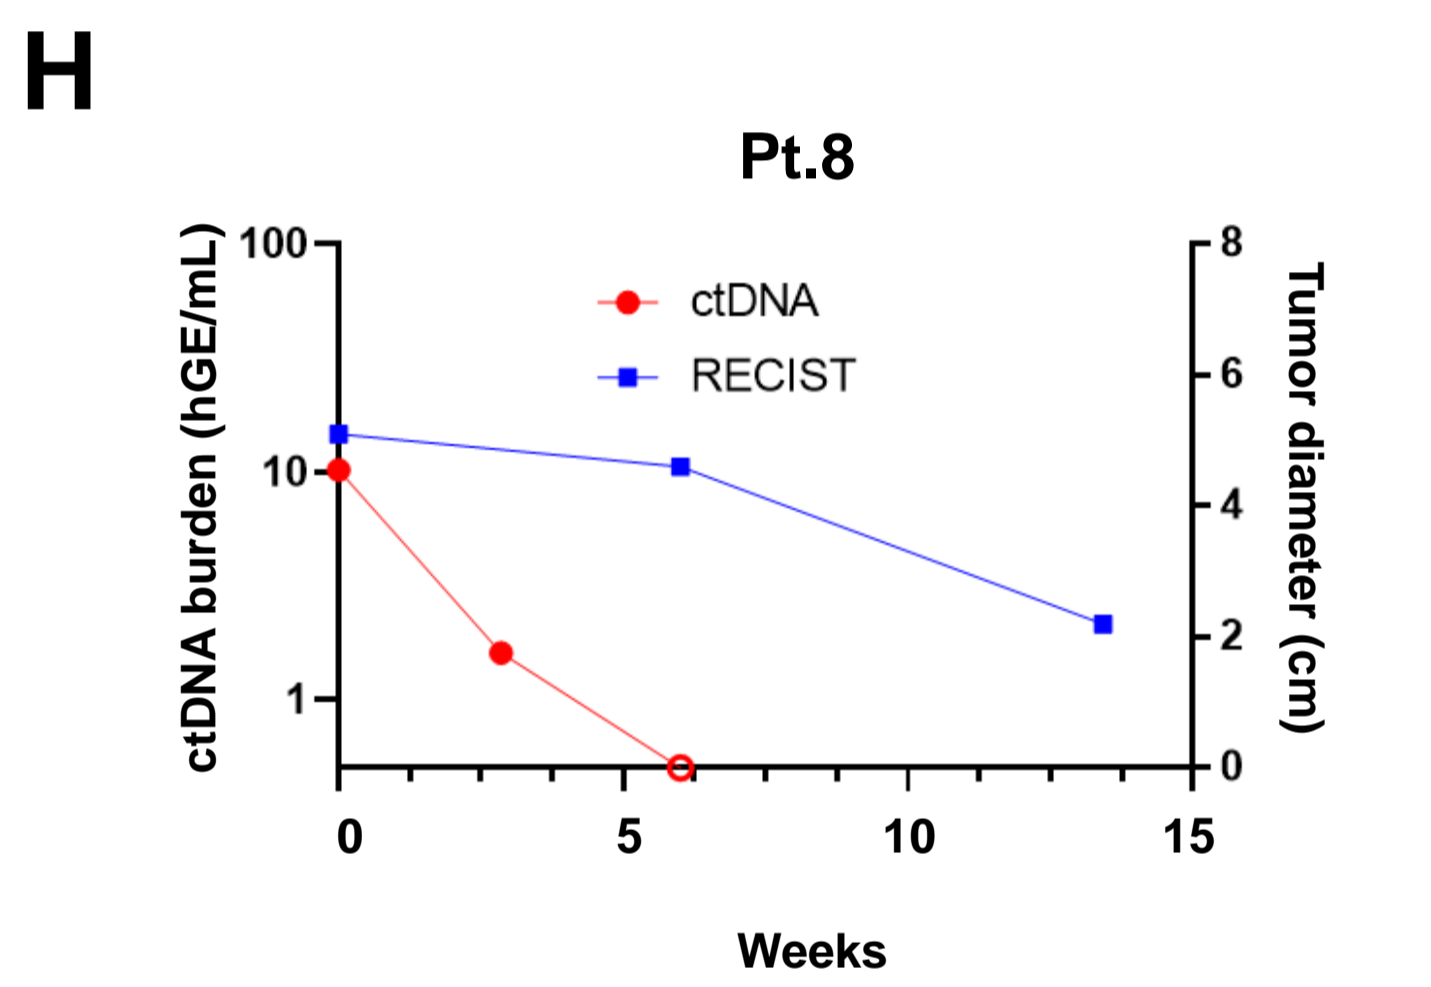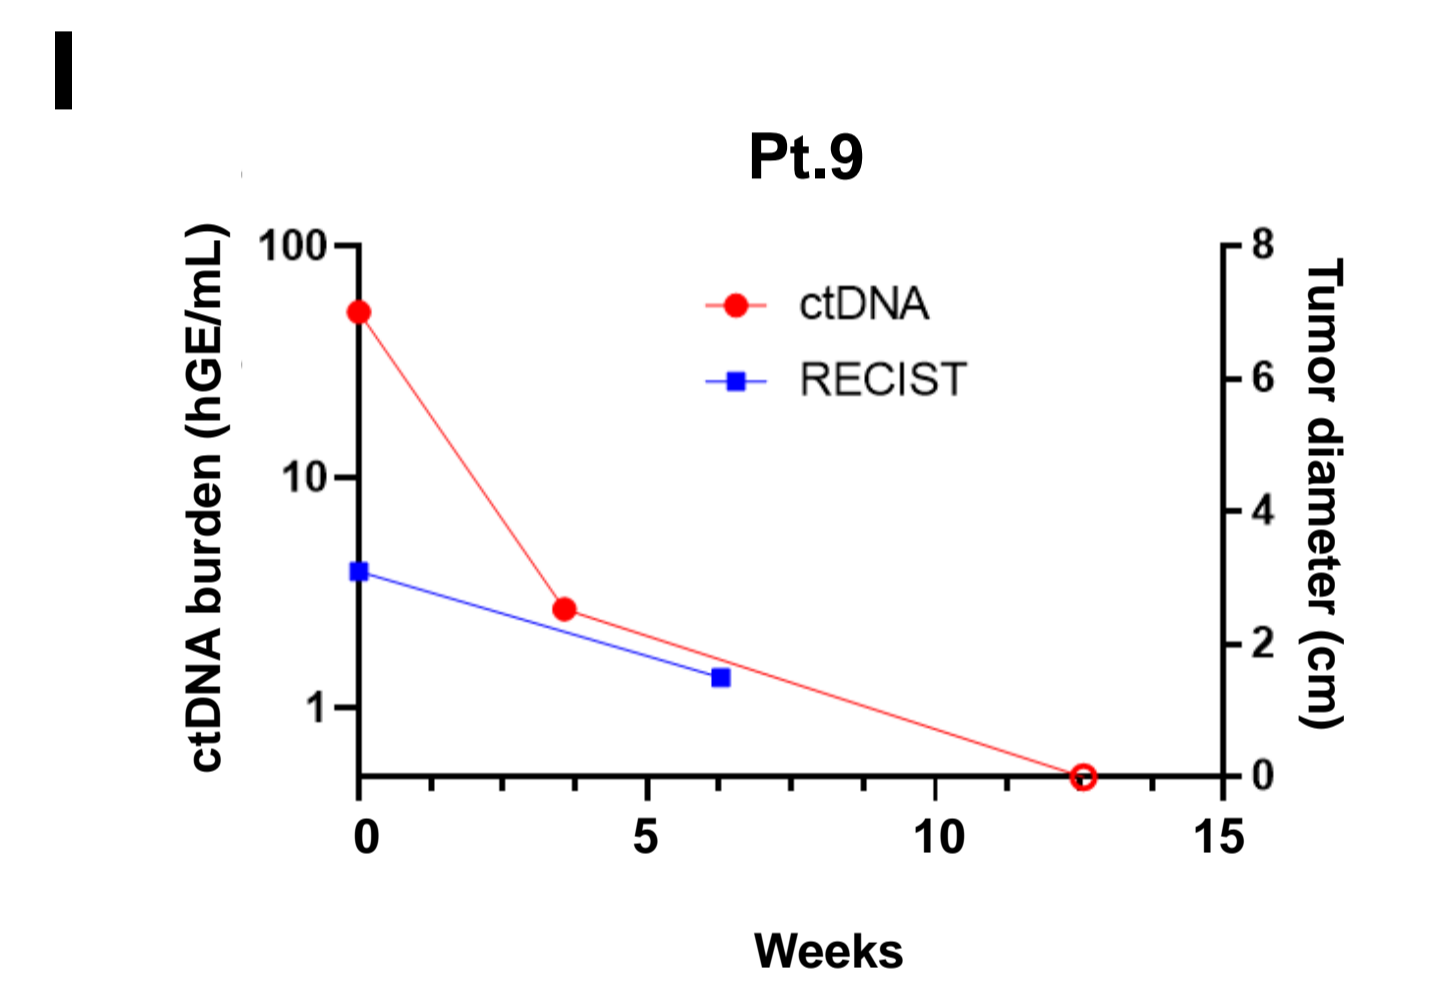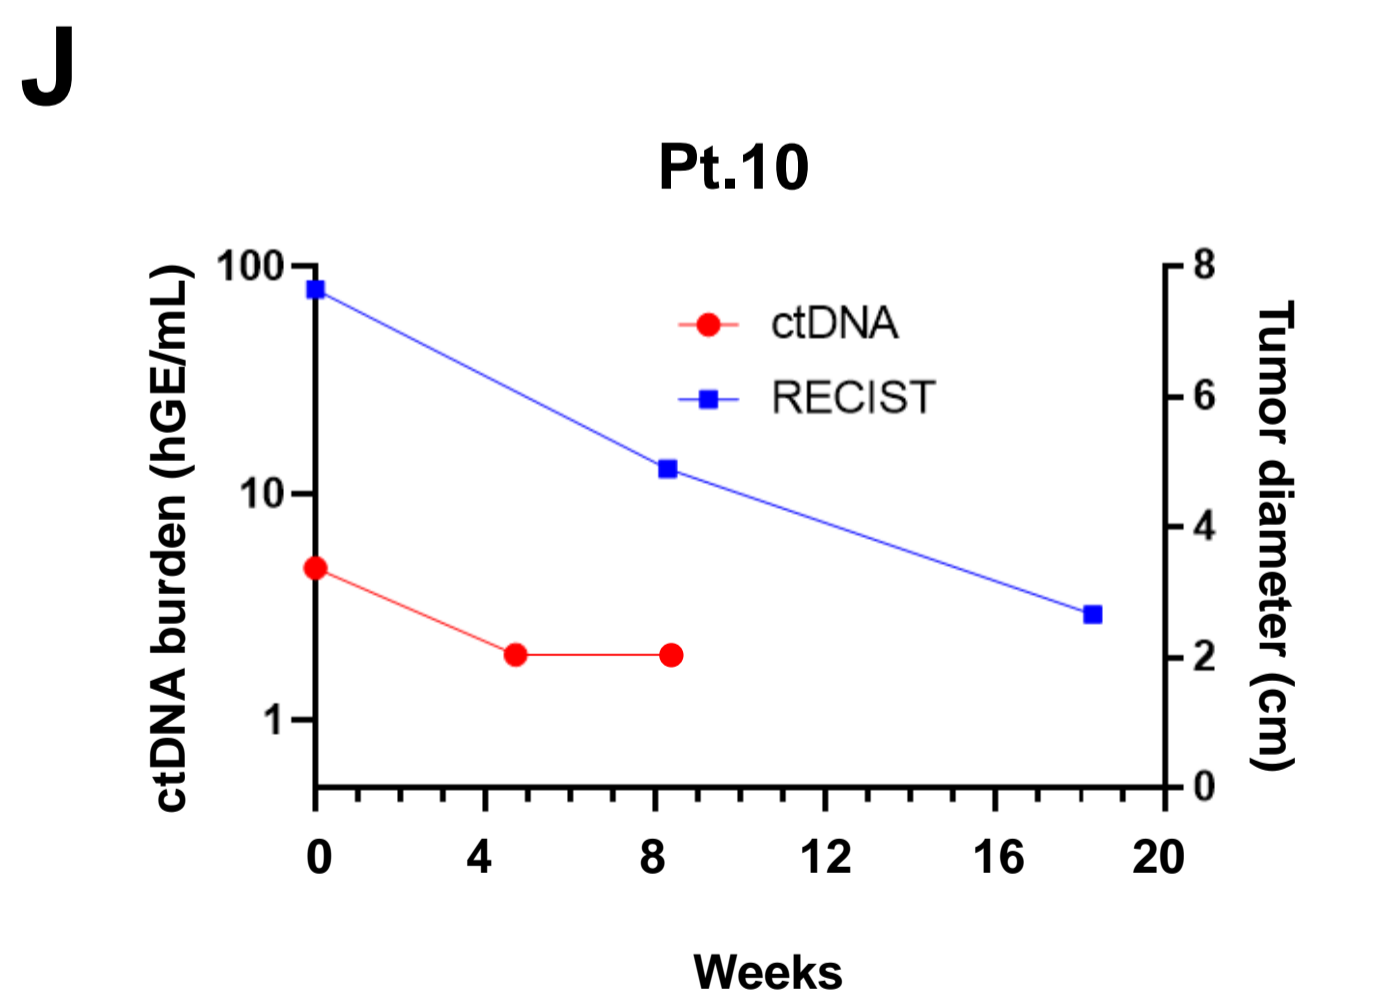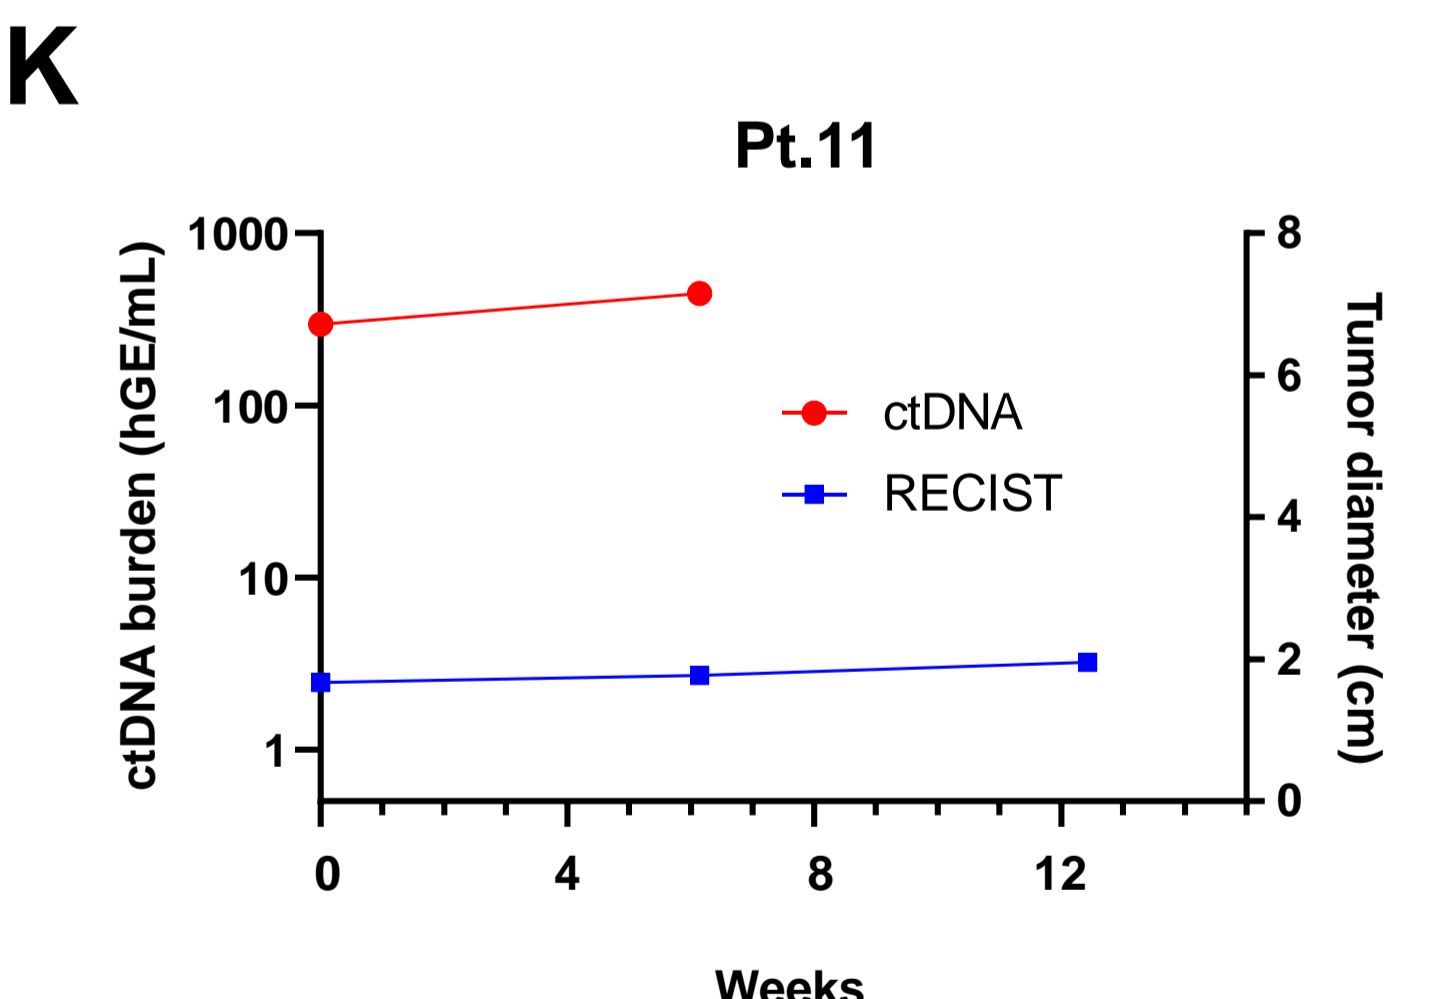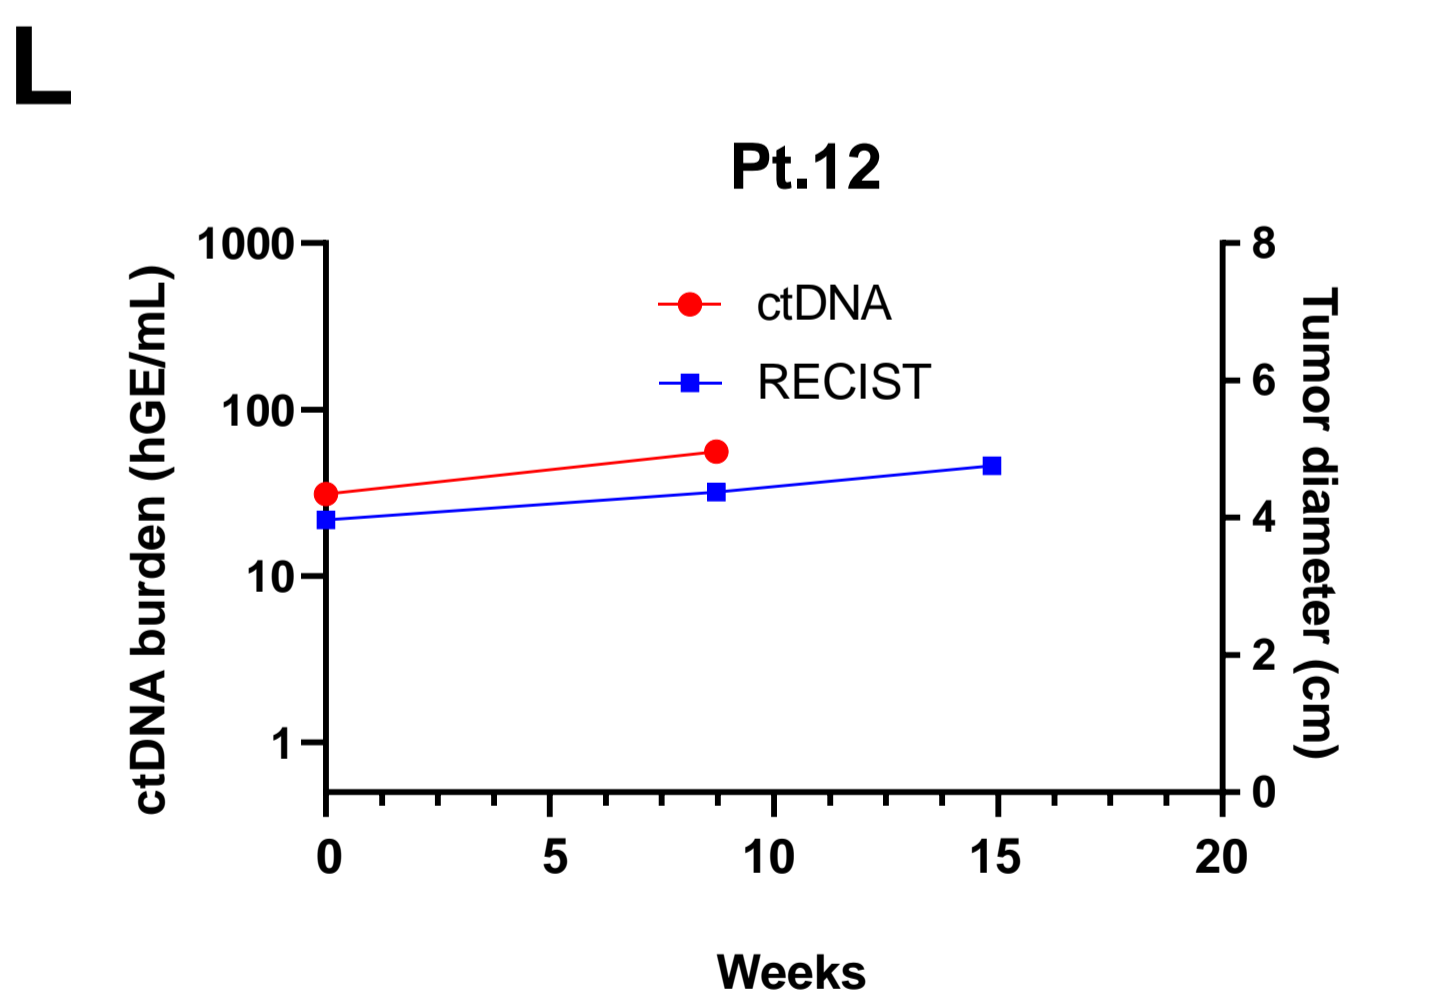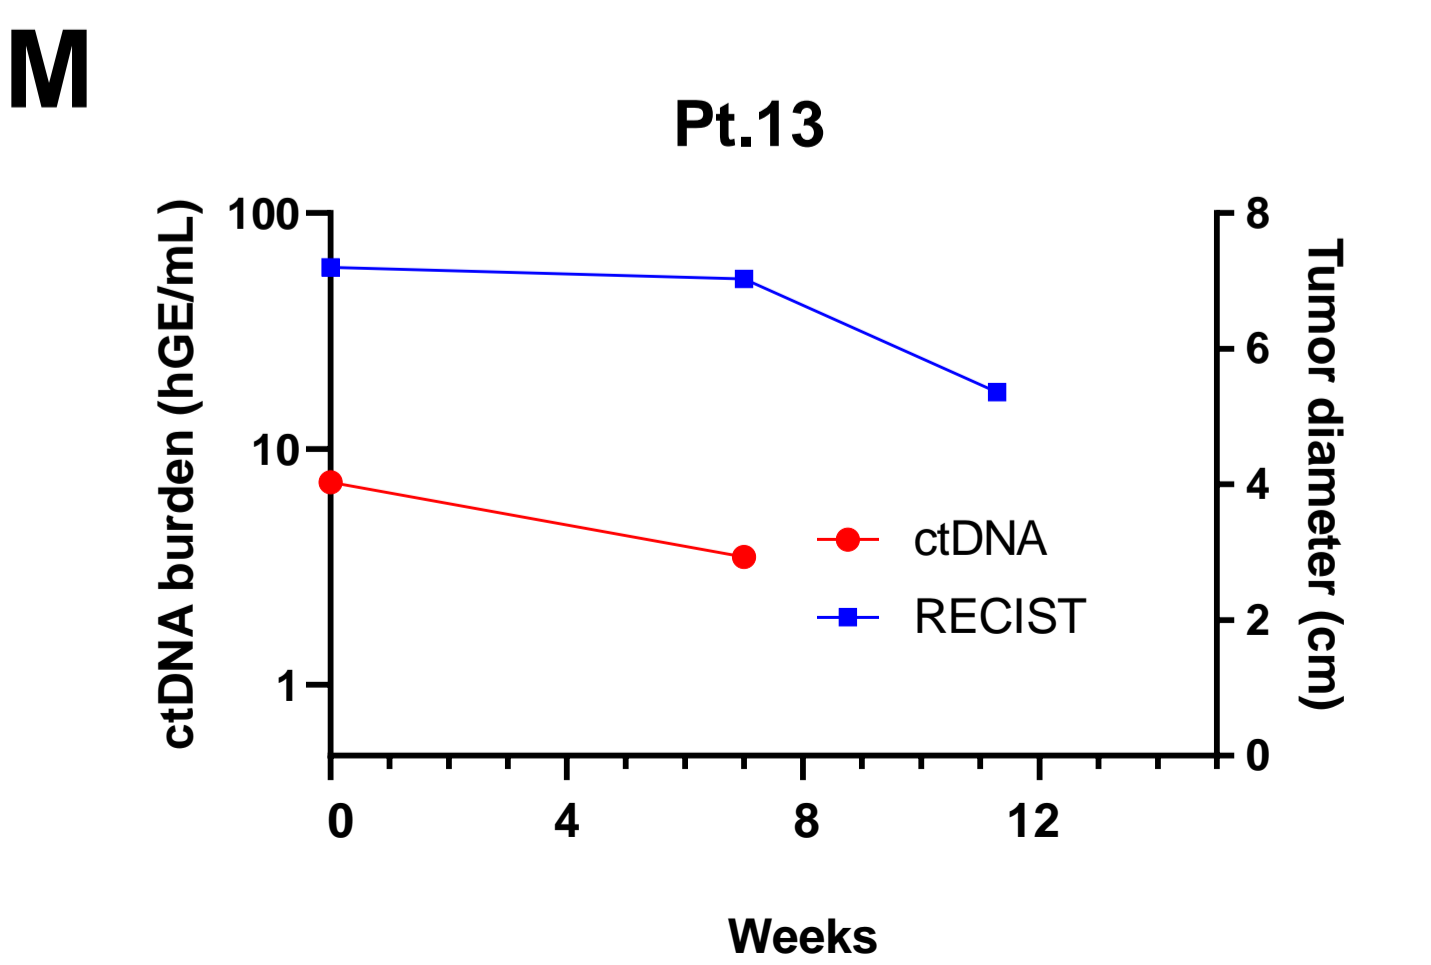

Supplement: CAM4-12-14317-s002.pdf [file CAM4-12-14317-s002.pdf]
